# Supplementary material for: Interspecies Diversity of Osmotic Gradient Deformability of Red Blood Cells in Human and Seven Vertebrate Animal Species
Source: MDPI journal article supplement (doi:10.3390/cells11081351), 2022-04-15
Supplement: s1 [file s1]

# Supplementary Materials: Interspecies diversity of osmotic gradient deformability of red blood cells in human and seven vertebrate animal species

Adam Varga, Adam Attila Matrai, Barbara Barath, Adam Deak, Laszlo Horvath and Norbert Nemeth

**Table S1.** Summary of significantly differing hematological parameters in human, dog, cat, pig, sheep, mouse, rat and rabbit blood samples.

|       | human                                                       | dog                                                 | cat                                                          | pig                                              | sheep                                               | mouse                                            | rat                                                      | rabbit                                                     |
|-------|-------------------------------------------------------------|-----------------------------------------------------|--------------------------------------------------------------|--------------------------------------------------|-----------------------------------------------------|--------------------------------------------------|----------------------------------------------------------|------------------------------------------------------------|
| human | n.a.                                                        | WBC, RBC, Hgb, Hct, MCV, MCH, Plt: p<0.001          | WBC: p=0.009, RBC, Hgb, Hct, MCV, MCH: p<0.001 MCHC: p=0.003 | WBC, RBC, Hgb, Hct, MCV, MCH, MCHC, Plt: p<0.001 | WBC, RBC, MCV, MCH, MCHC, Plt: p<0.001 Hgb: p=0.005 | WBC, RBC, MCV, MCH, Plt: p<0.001 Hct: p=0.028    | WBC, RBC, Hgb, Hct, MCV, MCH, Plt: p<0.001               | WBC: p=0.035 Hct: p=0.002 RBC, Hgb, MCV, MCH, Plt: p<0.001 |
| dog   | WBC, RBC, Hgb, Hct, MCV, MCH, Plt: p<0.001                  | n.a.                                                | RBC, Hgb, Hct, MCV, MCH, MCHC: p<0.001 Plt: p=0.004          | RBC, Hgb, Hct, MCV, MCH, MCHC, Plt: p<0.001      | WBC, RBC, Hgb, Hct, MCV, MCH, MCHC: p<0.001         | WBC, RBC, Hgb, Hct, MCV, MCH, MCHC, Plt: p<0.001 | WBC, RBC, Hgb, Hct, MCV, MCH, MCHC, Plt: p<0.001         | WBC, RBC, Hgb, Hct, MCV, MCH, MCHC: p<0.001 Plt: p=0.019   |
| cat   | WBC: p=0.009 RBC, Hgb, Hct, MCV, MCH: p<0.001 MCHC: p=0.003 | RBC, Hgb, Hct, MCV, MCH, MCHC: p<0.001 Plt: p=0.004 | n.a.                                                         | RBC, Hgb, Hct, MCV, MCH, Plt: p<0.001            | WBC, Hgb, Hct, MCV, MCH: p<0.001 RBC: p=0.004       | WBC, RBC, Hgb, Hct, MCV, MCH, MCHC, Plt: p<0.001 | WBC, RBC, Hgb, Hct, MCV, MCH, Plt: p<0.001 MCHC: p=0.004 | WBC: p=0.002 RBC, Hgb, Hct, MCV, MCH, MCHC, Plt: p<0.001   |

|               |                                                                  |                                                             |                                                             |                                                       |                                                                  |                                             |                                                 |                                                                  |
|---------------|------------------------------------------------------------------|-------------------------------------------------------------|-------------------------------------------------------------|-------------------------------------------------------|------------------------------------------------------------------|---------------------------------------------|-------------------------------------------------|------------------------------------------------------------------|
| <b>pig</b>    | WBC, RBC, Hgb, Hct, MCV, MCH, MCHC, Plt: p<0.001                 | RBC, Hgb, Hct, MCV, MCH, MCHC, Plt: p<0.001                 | RBC, Hgb, Hct, MCV, MCH, Plt: p<0.001                       | n.a.                                                  | WBC, RBC, Hgb, Hct, MCV, MCH: p<0.001<br>Plt: p=0.033            | WBC, RBC, Hgb, Hct, MCV, MCHC, Plt: p<0.001 | WBC, Hgb, MCH, MCHC: p<0.001                    | WBC, Hgb, Hct, MCV, MCH, MCHC, Plt: p<0.001                      |
| <b>sheep</b>  | WBC, RBC, MCV, MCH, MCHC, Plt: p<0.001<br>Hgb: p=0.005           | WBC, RBC, Hgb, Hct, MCV, MCH, MCHC: p<0.001                 | WBC, Hgb, Hct, MCV, MCH: p<0.001<br>RBC: p=0.004            | WBC, RBC, Hgb, Hct, MCV, MCH: p<0.001<br>Plt: p=0.033 | n.a.                                                             | WBC, RBC, Hgb, MCV, MCH, MCHC, Plt: p<0.001 | WBC, RBC, Hct, MCV, MCH, MCHC: p<0.001          | WBC, RBC, MCV, MCH, MCHC: p<0.001<br>Hgb: p=0.03<br>Plt: p=0.044 |
| <b>mouse</b>  | WBC, RBC, MCV, MCH, Plt: p<0.001<br>Hct: p=0.028                 | WBC, RBC, Hgb, Hct, MCV, MCH, MCHC, Plt: p<0.001            | WBC, RBC, Hgb, Hct, MCV, MCH, MCHC, Plt: p<0.001            | WBC, RBC, Hgb, Hct, MCV, MCHC, Plt: p<0.001           | WBC, RBC, Hgb, MCV, MCH, MCHC, Plt: p<0.001                      | n.a.                                        | WBC, RBC, Hgb, Hct, MCV, MCH, Plt: p<0.001      | RBC, Hct, MCV, MCH, Plt: p<0.001                                 |
| <b>rat</b>    | WBC, RBC, Hgb, Hct, MCV, MCH, Plt: p<0.001                       | WBC, RBC, Hgb, Hct, MCV, MCH, MCHC, Plt: p<0.001            | WBC, RBC, Hgb, Hct, MCV, MCH, Plt: p<0.001<br>MCHC: p=0.004 | WBC, Hgb, MCH, MCHC: p<0.001                          | WBC, RBC, Hct, MCV, MCH, MCHC: p<0.001                           | WBC, RBC, Hgb, Hct, MCV, MCH, Plt: p<0.001  | n.a.                                            | WBC, Hgb, MCV, MCH, Plt: p<0.001<br>Hct p=0.02                   |
| <b>rabbit</b> | WBC: p=0.035<br>Hct: p=0.002<br>RBC, Hgb, MCV, MCH, Plt: p<0.001 | WBC, RBC, Hgb, Hct, MCV, MCH, MCHC: p<0.001<br>Plt: p=0.019 | WBC: p=0.002<br>RBC, Hgb, Hct, MCV, MCH, MCHC, Plt: p<0.001 | WBC, Hgb, Hct, MCV, MCH, MCHC, Plt: p<0.001           | WBC, RBC, MCV, MCH, MCHC: p<0.001<br>Hgb: p=0.03<br>Plt: p=0.044 | RBC, Hct, MCV, MCH, Plt: p<0.001            | WBC, Hgb, MCV, MCH, Plt: p<0.001<br>Hct: p=0.02 | n.a.                                                             |

WBC: white blood cell count; Hct: hematocrit; RBC: red blood cell count; Hgb: hemoglobin; MCV: mean corpuscular volume; MCH: mean corpuscular hemoglobin; MCHC: mean corpuscular hemoglobin concentration, Plt: platelet count

**Table S2.** Summary of significantly differing conventional and osmotic gradient ektacytometry parameters in human, dog, cat, pig, sheep, mouse, rat and rabbit blood samples.

|       | human                                                                                                                                                                                   | dog                                                                                                                                                                                     | cat                                                                                                                                                               | pig                                                                                                                                                                            | sheep                                                                                                                                                                         | mouse                                                                                                                                               | rat                                                                                                                                                                       | rabbit                                                                                                                                                                                                       |
|-------|-----------------------------------------------------------------------------------------------------------------------------------------------------------------------------------------|-----------------------------------------------------------------------------------------------------------------------------------------------------------------------------------------|-------------------------------------------------------------------------------------------------------------------------------------------------------------------|--------------------------------------------------------------------------------------------------------------------------------------------------------------------------------|-------------------------------------------------------------------------------------------------------------------------------------------------------------------------------|-----------------------------------------------------------------------------------------------------------------------------------------------------|---------------------------------------------------------------------------------------------------------------------------------------------------------------------------|--------------------------------------------------------------------------------------------------------------------------------------------------------------------------------------------------------------|
| human | n.a.                                                                                                                                                                                    | EI at 3 Pa, EI <sub>max</sub> ,<br>SS <sub>1/2</sub> , EI <sub>max</sub> /SS <sub>1/2</sub> , EI<br>min, O min,<br>O (EI max), Area:<br>p<0.001<br>EI max: p=0.003<br>EI hyper: p=0.005 | EI at 3 Pa, EI <sub>max</sub> ,<br>SS <sub>1/2</sub> , EI <sub>max</sub> /SS <sub>1/2</sub> ,<br>O min, O (EI max),<br>O hyper: p<0.001<br>Area: p=0.009          | EI at 3 Pa, EI <sub>max</sub> ,<br>SS <sub>1/2</sub> , EI <sub>max</sub> /SS <sub>1/2</sub> ,<br>EI min,<br>O (EI max),<br>O hyper: p<0.001<br>O min: p=0.002<br>Area: p=0.005 | EI at 3 Pa, EI <sub>max</sub> ,<br>SS <sub>1/2</sub> , EI <sub>max</sub> /SS <sub>1/2</sub> ,<br>EI max, EI hyper,<br>O min, O (EI max),<br>Area: p<0.001<br>O hyper: p=0.004 | EI at 3 Pa, SS <sub>1/2</sub> ,<br>EI <sub>max</sub> /SS <sub>1/2</sub> :<br>p<0.001<br>O (EI max):<br>p=0.003<br>O hyper: p=0.004                  | EI at 3 Pa, EI <sub>max</sub> ,<br>SS <sub>1/2</sub> , EI <sub>max</sub> /SS <sub>1/2</sub> ,<br>O hyper: p<0.001<br>EI min: p=0.004<br>EI max: p=0.0047<br>Area: p=0.015 | EI at 3 Pa,<br>EI <sub>max</sub> , SS <sub>1/2</sub> ,<br>EI <sub>max</sub> /SS <sub>1/2</sub> :<br>p<0.001<br>EI min: p=0.004<br>EI max,<br>EI hyper:<br>p=0.012<br>O (EI max):<br>p=0.034<br>Area: p=0.007 |
| dog   | EI at 3 Pa, EI <sub>max</sub> ,<br>SS <sub>1/2</sub> , EI <sub>max</sub> /SS <sub>1/2</sub> ,<br>EI min, O min,<br>O (EI max), Area:<br>p<0.001<br>EI max: p=0.003<br>EI hyper: p=0.005 | n.a.                                                                                                                                                                                    | EI <sub>max</sub> , SS <sub>1/2</sub> ,<br>EI <sub>max</sub> /SS <sub>1/2</sub> , EI min,<br>EI max, EI hyper,<br>O min, O (EI max),<br>O hyper, Area:<br>p<0.001 | EI <sub>max</sub> , EI max,<br>EI hyper, O min,<br>O (EI max),<br>O hyper, Area:<br>p<0.001<br>SS <sub>1/2</sub> : p=0.004                                                     | EI at 3 Pa, SS <sub>1/2</sub> ,<br>EI <sub>max</sub> , EI min,<br>EI max, EI hyper,<br>O min, O (EI max),<br>Area: p<0.001<br>O hyper: p=0.01                                 | EI <sub>max</sub> , SS <sub>1/2</sub> ,<br>EI min, O min,<br>O (EI max),<br>O hyper, Area:<br>p<0.001<br>EI hyper: p=0.01<br>EI at 3 Pa:<br>p=0.006 | O min,<br>O (EI max),<br>O hyper: p<0.001<br>EI max: p=0.002<br>Area: p=0.012                                                                                             | SS <sub>1/2</sub> , O min,<br>O (EI max):<br>p<0.001<br>EI at 3 Pa:<br>p=0.011<br>EI <sub>max</sub> /SS <sub>1/2</sub> :<br>p=0.031<br>EI min: p=0.043                                                       |
| cat   | EI at 3 Pa, EI <sub>max</sub> ,<br>SS <sub>1/2</sub> , EI <sub>max</sub> /SS <sub>1/2</sub> , O<br>min, O (EI max),<br>O hyper: p<0.001<br>Area: p=0.009                                | EI <sub>max</sub> , SS <sub>1/2</sub> ,<br>EI <sub>max</sub> /SS <sub>1/2</sub> , EI<br>min, EI max, EI<br>hyper, O min,<br>O (EI max),<br>O hyper, Area:<br>p<0.001                    | n.a.                                                                                                                                                              | SS <sub>1/2</sub> , EI <sub>max</sub> /SS <sub>1/2</sub> ,<br>Area: p<0.001<br>EI min: p=0.003<br>O hyper: p=0.039                                                             | EI at 3 Pa, EI <sub>max</sub> ,<br>SS <sub>1/2</sub> , EI <sub>max</sub> /SS <sub>1/2</sub> , EI<br>max, EI hyper, O<br>min, Area: p<0.001<br>O (EI max):                     | EI at 3 Pa, EI <sub>max</sub> ,<br>EI <sub>max</sub> /SS <sub>1/2</sub> , EI<br>max, EI hyper,<br>O min, O (EI<br>max), Area:                       | EI <sub>max</sub> , EI <sub>max</sub> /SS <sub>1/2</sub> ,<br>O (EI max),<br>O hyper, Area:<br>p<0.001<br>EI min: p=0.035                                                 | EI <sub>max</sub> , SS <sub>1/2</sub> ,<br>EI <sub>max</sub> /SS <sub>1/2</sub> ,<br>EI min, EI max,<br>O min,<br>O (EI max),                                                                                |

|              |                                                                                                                                                                               |                                                                                                                                               |                                                                                                                                                                                                             |                                                                                                                    |                                                                                                                    |                                                                                                                                                                                  |                                                                                                                                                |                                                                                                                                                                                                         |
|--------------|-------------------------------------------------------------------------------------------------------------------------------------------------------------------------------|-----------------------------------------------------------------------------------------------------------------------------------------------|-------------------------------------------------------------------------------------------------------------------------------------------------------------------------------------------------------------|--------------------------------------------------------------------------------------------------------------------|--------------------------------------------------------------------------------------------------------------------|----------------------------------------------------------------------------------------------------------------------------------------------------------------------------------|------------------------------------------------------------------------------------------------------------------------------------------------|---------------------------------------------------------------------------------------------------------------------------------------------------------------------------------------------------------|
|              |                                                                                                                                                                               |                                                                                                                                               |                                                                                                                                                                                                             |                                                                                                                    | p=0.011<br>EI min: p=0.014<br>O hyper: p=0.019                                                                     | p<0.001<br>SS <sub>1/2</sub> : p=0.043                                                                                                                                           | O min: p=0.003<br>EI max: p=0.005<br>EI hyper:<br>p=0.011<br>SS <sub>1/2</sub> : p=0.043                                                       | Area: p<0.001<br>EI hyper:<br>p=0.006<br>EI at 3 Pa:<br>p=0.032                                                                                                                                         |
| <b>pig</b>   | EI at 3 Pa, EI <sub>max</sub> ,<br>SS <sub>1/2</sub> , EI <sub>max</sub> /SS <sub>1/2</sub> , EI<br>min, O (EI max),<br>O hyper: p<0.001<br>O min: p=0.002<br>Area: p=0.005   | EI <sub>max</sub> , EI max,<br>EI hyper, O min,<br>O (EI max),<br>O hyper, Area:<br>p<0.001<br>SS <sub>1/2</sub> : p=0.004                    | SS <sub>1/2</sub> , EI <sub>max</sub> /SS <sub>1/2</sub> ,<br>Area: p<0.001<br>EI min: p=0.003<br>O hyper: p=0.039                                                                                          | n.a.                                                                                                               | EI at 3 Pa, SS <sub>1/2</sub> ,<br>EI <sub>max</sub> , EI max,<br>EI hyper, O min,<br>O (EI max), Area:<br>p<0.001 | EI at 3 Pa, SS <sub>1/2</sub> ,<br>EI max, EI<br>hyper: p<0.001<br>EI min: p=0.003<br>O (EI max):<br>p=0.015                                                                     | EI max, O min,<br>O (EI max):<br>p<0.001<br>EI <sub>max</sub> /SS <sub>1/2</sub> :<br>p=0.009<br>Area: p=0.01<br>SS <sub>1/2</sub> : p=0.024   | EI <sub>max</sub> , EI max,<br>Area: p<0.001<br>O min: p=0.002<br>EI <sub>max</sub> /SS <sub>1/2</sub> ,<br>O (EI max):<br>p=0.003<br>EI hyper:<br>p=0.004<br>EI at 3 Pa:<br>p=0.007<br>EI min: p=0.008 |
| <b>sheep</b> | EI at 3 Pa, EI <sub>max</sub> ,<br>SS <sub>1/2</sub> , EI <sub>max</sub> /SS <sub>1/2</sub> , EI<br>max, EI hyper, O<br>min, O (EI max),<br>Area: p<0.001<br>O hyper: p=0.004 | EI at 3 Pa, SS <sub>1/2</sub> ,<br>EI <sub>max</sub> , EI min, EI<br>max, EI hyper, O<br>min, O (EI max),<br>Area: p<0.001<br>O hyper: p=0.01 | EI at 3 Pa, EI <sub>max</sub> ,<br>SS <sub>1/2</sub> , EI <sub>max</sub> /SS <sub>1/2</sub> , EI<br>max, EI hyper, O<br>min, Area: p<0.001<br>O (EI max):<br>p=0.011<br>EI min: p=0.014<br>O hyper: p=0.019 | EI at 3 Pa, SS <sub>1/2</sub> ,<br>EI <sub>max</sub> , EI max, EI<br>hyper, O min, O<br>(EI max), Area:<br>p<0.001 | n.a.                                                                                                               | EI at 3 Pa, EI <sub>max</sub> ,<br>SS <sub>1/2</sub> , EI <sub>max</sub> /SS <sub>1/2</sub> ,<br>EI max, EI<br>hyper, O min, O<br>(EI max), Area:<br>p<0.001<br>O hyper: p=0.003 | EI at 3 Pa, SS <sub>1/2</sub> ,<br>EI <sub>max</sub> , EI min, EI<br>max, EI hyper, O<br>min, O (EI max),<br>Area: p<0.001<br>O hyper: p=0.024 | EI at 3 Pa,<br>EI <sub>max</sub> , SS <sub>1/2</sub> , EI<br>min, EI max, EI<br>hyper, O min,<br>O (EI max),<br>Area: p<0.001<br>EI <sub>max</sub> /SS <sub>1/2</sub> :<br>p=0.033                      |
| <b>mouse</b> | EI at 3 Pa, SS <sub>1/2</sub> ,<br>EI <sub>max</sub> /SS <sub>1/2</sub> : p<0.001                                                                                             | EI <sub>max</sub> , SS <sub>1/2</sub> ,<br>EI <sub>max</sub> /SS <sub>1/2</sub> , EI min,                                                     | EI at 3 Pa, EI <sub>max</sub> ,<br>EI <sub>max</sub> /SS <sub>1/2</sub> , EI max,                                                                                                                           | EI at 3 Pa, EI <sub>max</sub> ,<br>SS <sub>1/2</sub> , EI hyper:                                                   | EI at 3 Pa, EI <sub>max</sub> ,<br>SS <sub>1/2</sub> , EI <sub>max</sub> /SS <sub>1/2</sub> , EI                   | n.a.                                                                                                                                                                             | EI <sub>max</sub> , SS <sub>1/2</sub> ,<br>EI <sub>max</sub> /SS <sub>1/2</sub> , O                                                            | EI min, EI max,<br>O (EI max),                                                                                                                                                                          |

|               |                                                                                                                                                                                                        |                                                                                                                                               |                                                                                                                                                                                                                 |                                                                                                                                                                                                          |                                                                                                                                                                              |                                                                                                                                                                      |                                                                               |                                                                              |
|---------------|--------------------------------------------------------------------------------------------------------------------------------------------------------------------------------------------------------|-----------------------------------------------------------------------------------------------------------------------------------------------|-----------------------------------------------------------------------------------------------------------------------------------------------------------------------------------------------------------------|----------------------------------------------------------------------------------------------------------------------------------------------------------------------------------------------------------|------------------------------------------------------------------------------------------------------------------------------------------------------------------------------|----------------------------------------------------------------------------------------------------------------------------------------------------------------------|-------------------------------------------------------------------------------|------------------------------------------------------------------------------|
|               | O (EI max):<br>p=0.003<br>O hyper: p=0.004                                                                                                                                                             | O min, O (EI max),<br>O hyper, Area:<br>p<0.001<br>EI hyper: p=0.01<br>EI at 3 Pa: p=0.006                                                    | EI hyper, O min,<br>O (EI max), Area:<br>p<0.001<br>SS <sub>1/2</sub> : p=0.043                                                                                                                                 | p<0.001<br>EI min: p=0.003<br>O (EI max):<br>p=0.015                                                                                                                                                     | max, EI hyper, O<br>min, O (EI max),<br>Area: p<0.001<br>O hyper: p=0.003                                                                                                    |                                                                                                                                                                      | hyper: p<0.001<br>EI at 3 Pa:<br>p=0.004<br>O min: p=0.014<br>EI min: p=0.023 | Area: p<0.001<br>O min: p=0.007<br>SS <sub>1/2</sub> : p=0.009               |
| <b>rat</b>    | EI at 3 Pa, EI <sub>max</sub> ,<br>SS <sub>1/2</sub> , EI <sub>max</sub> /SS <sub>1/2</sub> , O<br>hyper: p<0.001<br>EI min: p=0.004<br>EI max: p=0.0047<br>Area: p=0.015                              | O min, O (EI max),<br>O hyper: p<0.001<br>EI max: p=0.002<br>Area: p=0.012                                                                    | EI <sub>max</sub> , EI <sub>max</sub> /SS <sub>1/2</sub> , O<br>(EI max), O hyper,<br>Area: p<0.001<br>O min: p=0.003<br>EI min: p=0.035<br>EI max: p=0.005<br>EI hyper: p=0.011<br>SS <sub>1/2</sub> : p=0.043 | EI max, O min,<br>O (EI max):<br>p<0.001<br>EI <sub>max</sub> /SS <sub>1/2</sub> : p=0.009<br>SS <sub>1/2</sub> : p=0.024<br>Area: p=0.01                                                                | EI at 3 Pa, EI <sub>max</sub> ,<br>SS <sub>1/2</sub> , EI min, EI<br>max, EI hyper, O<br>min, O (EI max),<br>Area: p<0.001<br>O hyper: p=0.024                               | EI <sub>max</sub> , SS <sub>1/2</sub> ,<br>EI <sub>max</sub> /SS <sub>1/2</sub> , O<br>hyper: p<0.001<br>EI at 3 Pa:<br>p=0.004<br>O min: p=0.014<br>EI min: p=0.023 | n.a.                                                                          | EI <sub>max</sub> , SS <sub>1/2</sub> :<br>p<0.001<br>EI at 3 Pa:<br>p=0.027 |
| <b>rabbit</b> | EI at 3 Pa, EI <sub>max</sub> ,<br>SS <sub>1/2</sub> , EI <sub>max</sub> /SS <sub>1/2</sub> :<br>p<0.001<br>EI min: p=0.004<br>Area: p=0.007<br>EI max, EI hyper:<br>p=0.012<br>O (EI max):<br>p=0.034 | SS <sub>1/2</sub> , O min, O (EI<br>max): p<0.001<br>EI at 3 Pa: p=0.011<br>EI <sub>max</sub> /SS <sub>1/2</sub> : p=0.031<br>EI min: p=0.043 | EI <sub>max</sub> , SS <sub>1/2</sub> , EI min,<br>EI max, O min, O<br>(EI max), Area:<br>p<0.001<br>EI hyper: p=0.006<br>EI at 3 Pa: p=0.032                                                                   | EI <sub>max</sub> , EI max,<br>EI min: p=0.008<br>O min: p=0.002<br>O (EI max):<br>p=0.003<br>EI hyper: p=0.004<br>Area: p<0.00<br>EI at 3 Pa: p=0.007<br>EI <sub>max</sub> /SS <sub>1/2</sub> : p=0.003 | EI at 3 Pa, EI <sub>max</sub> ,<br>SS <sub>1/2</sub> , EI min, EI<br>max, EI hyper, O<br>min, O (EI max),<br>Area: p<0.001<br>EI <sub>max</sub> /SS <sub>1/2</sub> : p=0.033 | EI min, EI max,<br>O (EI max),<br>Area: p<0.001<br>O min: p=0.007<br>SS <sub>1/2</sub> : p=0.009                                                                     | EI <sub>max</sub> , SS <sub>1/2</sub> :<br>p<0.001<br>EI at 3 Pa:<br>p=0.027  | n.a.                                                                         |

EI at 3 Pa: elongation index at 3 Pa, EI<sub>max</sub>: calculated maximal elongation index, SS<sub>1/2</sub>: shear stress at half EI<sub>max</sub>,

EI min: minimal elongation index in low osmolar environment, O min: osmolality at EI min, EI max: the maximal elongation index in the function of osmolality, O (EI max): the osmolality at EI max, EI hyper: half of the maximal elongation index at high osmolar environment, O hyper: osmolality at EI hyper, Area: calculated from the area under the individual elongation index-osmolality curves.
